# Supplementary material
Source: Springer Nature journal article supplement (https://www.springermedizin.de/resource/supplementary/12885_2009_2180_MOESM4_ESM.pdf/9460702)

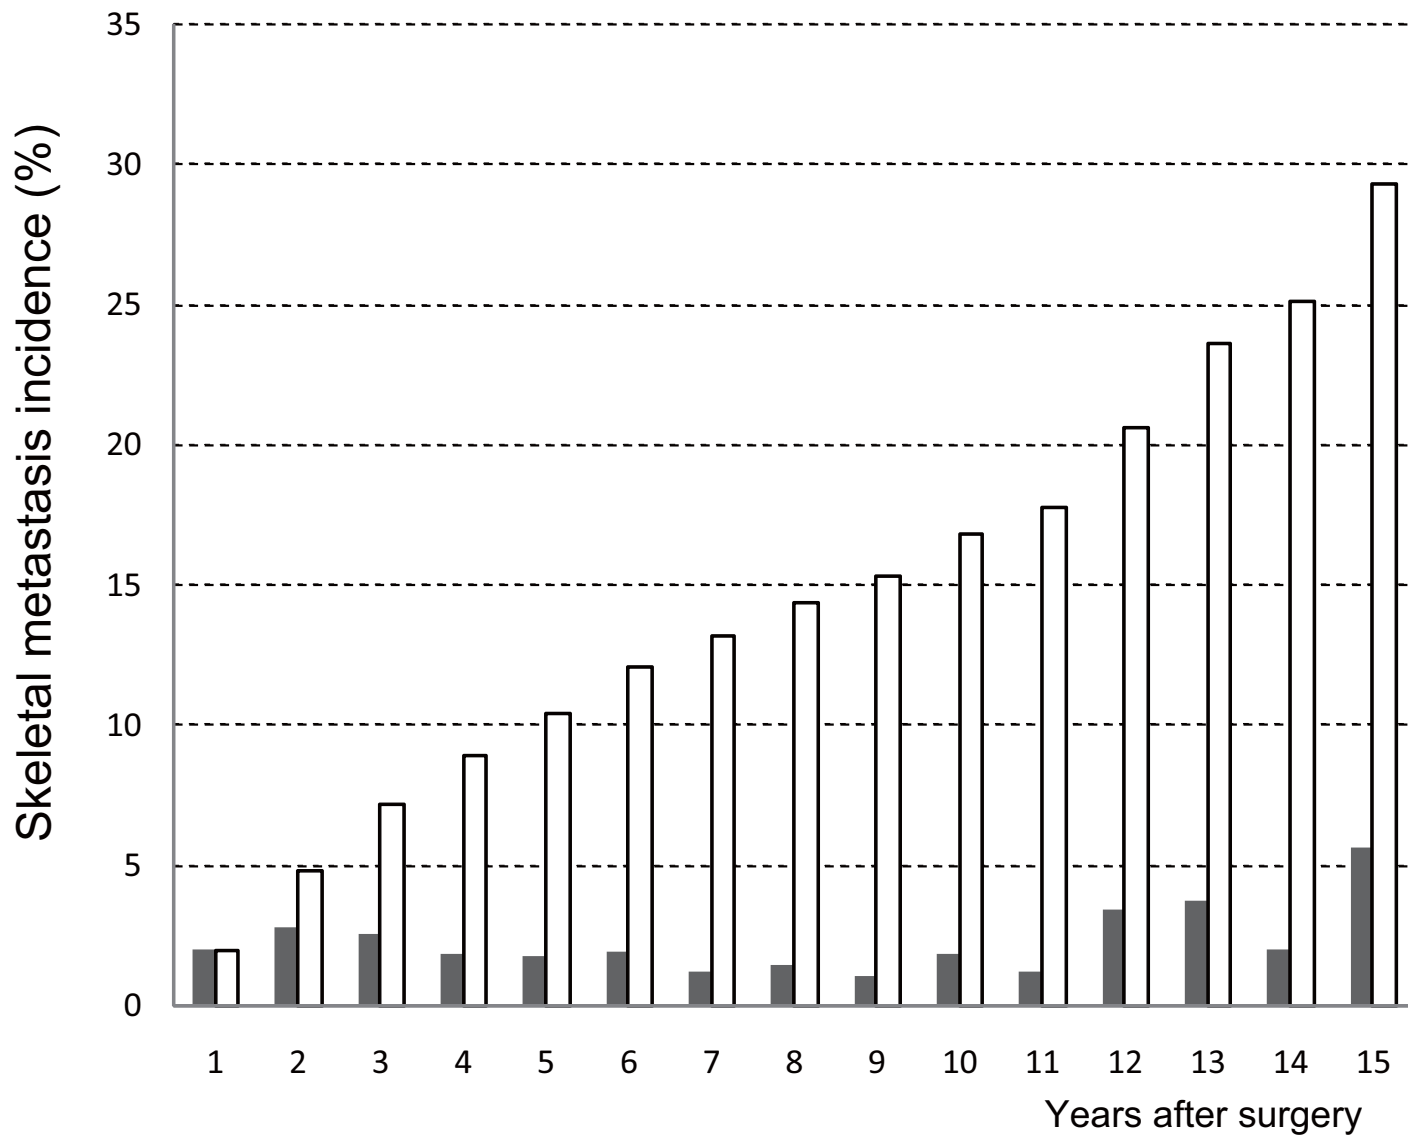

|                  | 1    | 2    | 3    | 4    | 5    | 6    | 7    | 8    | 9    | 10   | 11  | 12  | 13  | 14  | 15  | (years) |
|------------------|------|------|------|------|------|------|------|------|------|------|-----|-----|-----|-----|-----|---------|
| Patients at risk | 5459 | 4821 | 4464 | 4126 | 3842 | 3430 | 2861 | 2370 | 1868 | 1358 | 827 | 454 | 293 | 183 | 115 |         |
| Bone metastasis  | 106  | 133  | 110  | 72   | 61   | 61   | 32   | 29   | 17   | 20   | 8   | 13  | 9   | 3   | 5   |         |

Supplement: MOESM4 [file 9460702]
